# Supplementary material for: How to learn more about hydrological conditions and phytoplankton dynamics and diversity in the eastern English Channel and the Southern Bight of the North Sea: the Suivi Régional des Nutriments data set (1992–2021)
Source: Copernicus journal article supplement (doi:10.5194/essd-15-1077-2023), 2023-03-10
Supplement: Supplementary file 1 [file essd-15-1077-2023-supplement.zip]

Archive with 2 entries (2 files):
- S1_Supp_Material_Translation_header_FR_ENG.csv
- essd-15-1077-2023-supplement-title-page.pdf
