# Supplementary material for: How to learn more about hydrological conditions and phytoplankton dynamics and diversity in the eastern English Channel and the Southern Bight of the North Sea: the Suivi Régional des Nutriments data set (1992–2021)
Source: Copernicus journal article supplement (doi:10.5194/essd-15-1077-2023), 2023-03-10
Supplement: Supplementary file 1 [file essd-15-1077-2023-supplement.zip › essd-15-1077-2023-supplement-title-page.pdf]

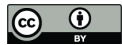

## *Supplement of*

# **How to learn more about hydrological conditions and phytoplankton dynamics and diversity in the eastern English Channel and the Southern Bight of the North Sea: the Suivi Régional des Nutriments data set (1992–2021)**

**Alain Lefebvre and David Devreker**

*Correspondence to:* Alain Lefebvre ([alain.lefebvre@ifremer.fr](mailto:alain.lefebvre@ifremer.fr))

- [essd-15-1077-2023-supplement-title-page.pdf](#)
- [S1\\_Supp\\_Material\\_Translation\\_header\\_FR\\_ENG.csv](#)

The copyright of individual parts of the supplement might differ from the article licence.
