# Supplementary material for: How to learn more about hydrological conditions and phytoplankton dynamics and diversity in the eastern English Channel and the Southern Bight of the North Sea: the Suivi Régional des Nutriments data set (1992–2021)
Source: Copernicus journal article supplement (doi:10.5194/essd-15-1077-2023), 2023-03-10
Supplement: Supplementary file 1 [file essd-15-1077-2023-supplement.zip › S1_Supp_Material_Translation_header_FR_ENG.csv]

French column labels	Corresponding English labels	Extra comments
Lieu de surveillance : Libellé	Monitoring location: Name
Lieu de surveillance : Identifiant	Monitoring location: Identifier
Lieu de surveillance : Mnémonique	Monitoring location: Mnemonic
Passage : Date	Passage: Date
Echantillon : Identifiant interne	Sample: Internal identifier
Prélèvement : Niveau	Sample: Level
Résultat : Code paramètre	Result: Parameter code
Résultat : Libellé précision	Result: Precision label
Résultat : Valeur de la mesure	Result : Measurement value
Résultat : Valeur qualitative	Result: Qualitative value
Résultat : Date de validation	Result: Validation date
Résultat : Niveau de qualité	Result: Quality level
Résultat : Libellé méthode	Result: Method label
Résultat : Service analyste : Libellé	Result: Analytical Service: Label
Résultat : Commentaires	Result: Comments
Passage : Heure	Passage: Time
Passage : Format UT de l'heure	Passage: Time UT format
Coordonnées passage : Coordonnées minx	Passage coordinates: Minx coordinates	Longitude
Coordonnées passage : Coordonnées maxx	Passage coordinates: maxx coordinates	Longitude
Coordonnées passage : Coordonnées miny	Passage coordinates: miny coordinates	Latitude
Coordonnées passage : Coordonnées maxy	Passage coordinates: maxy coordinates	Latitude
Lieu de surveillance : Entité de classement	Monitoring Location: Rating Entity
Lieu de surveillance : Entité de classement : Identifiant	Monitoring location: Rating entity: Identifier
Lieu de surveillance : Entité de classement : Rang du lieu	Monitoring location: Rating entity: Location rank
Lieu de surveillance : Entité de classement : Libellé	Monitoring Location: Rating Entity: Label
Passage : Identifiant interne	Passage: Internal Identifier
Passage : Mois	Passage: Month
Passage : Année	Passage: Year
Passage : Date de validation	Passage: Validation Date
Passage : Niveau de qualité	Passage: Quality Level
Passage : Date de qualification	Pass: Date of qualification
Passage : Commentaire de qualification	Passage: Qualification Comment
Prélèvement : Identifiant interne	Sample: Internal identifier
Prélèvement : Service préleveur : Code	Sample: Sample Collection Department: Code
Prélèvement : Service préleveur : Libellé	Sampling : Sampling department : Name
Libellé de l'engin de prélévement	Name of the sampling device
Prélèvement : Immersion	Sampling: Immersion
Prélèvement : Immersion Min	Sample: Immersion Min
Prélèvement : Immersion Max	Sample: Immersion Max
Prélèvement : Symbole de l'unité d'immersion	Sample: Dip unit symbol
Prélèvement : Unité d'immersion	Sampling: Immersion unit
Prélèvement : Date de validation	Sampling : Validation date
Prélèvement : Niveau de qualité	Sample: Quality level
Prélèvement : Date de qualification	Sampling : Qualification Date
Prélèvement : Commentaire de qualification	Sample: Qualification comment
Echantillon : Libellé du support	Sample : Support Label
Echantillon : Commentaire	Sample : Comment
Echantillon : Date de validation	Sample: Validation Date
Echantillon : Niveau de qualité	Sample: Quality Level
Echantillon : Date de qualification	Sample: Qualification Date
Echantillon : Commentaire de qualification	Sample: Qualification Comment
Résultat : Identifiant	Result : Identifier
Résultat : Service analyste : Code	Result : Analytical department : Code
Résultat : Libellé paramètre	Result : Parameter label
Résultat : Libellé support	Result: Media Label
Résultat : Libellé fraction	Result: Fraction label
Résultat : Symbole unité de mesure associé au quintuplet	Result: Unit of measure symbol associated with the quintuplet	Units
Résultat : Libellé unité de mesure associé au quintuplet	Result: Unit of measure label associated with the quintuplet	Units
Résultat : Date de qualification	Result: Qualification date
Résultat : Commentaire de qualification	Result: Qualification comment
Résultat : Nom du taxon référent	Result: Name of the referent taxon
